# Supplementary material for: MHC Class II Binding Prediction—A Little Help from a Friend
Source: Hindawi journal article supplement (doi:10.1155/2010/705821), 2010-01-01
Supplement: f1 [file 705821.f1.xls]

## Sheet: ImmuneEpitope
*0101 2051 binders	numbers						%
server	top 5%	top 10%	top 15%	top 20%	top 25%		top 5%	top 10%	top 15%	top 20%	top 25%
NetMHCII	918	1314	1549	1716	1812		44.7587	64.0663	75.5241	83.6665	88.3471
NetMHCIIpan	924	1389	1659	1818	1907		45.0512	67.7231	80.8874	88.6397	92.979
ProPred	714	733	733	733	733		34.8123	35.7387	35.7387	35.7387	35.7387
RANKPEP	901	1368	1641	1807	1807		43.9298	66.6992	80.0098	88.1034	88.1034
IEDB-ARB	270	453	630	765	894		13.1643	22.0868	30.7167	37.2989	43.5885
IEDB-SMMalign	334	583	768	932	1078		16.2847	28.4252	37.4451	45.4412	52.5597
EpiTOP	801	1280	1556	1753	1867		39.0541	62.4086	75.8654	85.4705	91.0288
MHC2Pred	288	502	677	842	977		14.0419	24.4759	33.0083	41.0531	47.6353
*0301 190 binders	numbers						%
server	top 5%	top 10%	top 15%	top 20%	top 25%		top 5%	top 10%	top 15%	top 20%	top 25%
NetMHCII	108	146	160	173	177		56.8421	76.8421	84.2105	91.0526	93.1579
NetMHCIIpan	120	146	168	177	180		63.1579	76.8421	88.4211	93.1579	94.7368
ProPred	97	137	137	137	137		51.0526	72.1053	72.1053	72.1053	72.1053
RANKPEP	85	123	148	163	163		44.7368	64.7368	77.8947	85.7895	85.7895
IEDB-ARB	24	46	59	69	80		12.6316	24.2105	31.0526	36.3158	42.1053
IEDB-SMMalign	45	64	84	96	107		23.6842	33.6842	44.2105	50.5263	56.3158
EpiTOP	93	126	154	168	177		48.9474	66.3158	81.0526	88.4211	93.1579
MHC2Pred	35	53	79	97	108		18.4211	27.8947	41.5789	51.0526	56.8421
*0401 392 binders	numbers						%
server	top 5%	top 10%	top 15%	top 20%	top 25%		top 5%	top 10%	top 15%	top 20%	top 25%
NetMHCII	277	331	359	376	383		70.6633	84.4388	91.5816	95.9184	97.7041
NetMHCIIpan	259	326	355	373	383		66.0714	83.1633	90.5612	95.1531	97.7041
ProPred	239	294	294	294	294		60.9694	75	75	75	75
RANKPEP	207	279	332	356	356		52.8061	71.1735	84.6939	90.8163	90.8163
IEDB-ARB	79	114	157	185	210		20.1531	29.0816	40.051	47.1939	53.5714
IEDB-SMMalign	123	178	215	241	255		31.3776	45.4082	54.8469	61.4796	65.051
EpiTOP	198	277	326	357	376		50.5102	70.6633	83.1633	91.0714	95.9184
MHC2Pred	62	93	132	163	191		15.8163	23.7245	33.6735	41.5816	48.7245
*0404 159 binders	numbers						%
server	top 5%	top 10%	top 15%	top 20%	top 25%		top 5%	top 10%	top 15%	top 20%	top 25%
NetMHCII	91	115	128	139	143		57.2327	72.327	80.5031	87.4214	89.9371
NetMHCIIpan	107	129	144	148	150		67.2956	81.1321	90.566	93.0818	94.3396
ProPred	85	112	112	112	112		53.4591	70.4403	70.4403	70.4403	70.4403
RANKPEP	68	106	130	147	147		42.7673	66.6667	81.761	92.4528	92.4528
IEDB-ARB	27	45	58	77	85		16.9811	28.3019	36.478	48.4277	53.4591
IEDB-SMMalign	45	58	75	84	99		28.3019	36.478	47.1698	52.8302	62.2642
EpiTOP	70	107	130	147	152		44.0252	67.2956	81.761	92.4528	95.5975
MHC2Pred	69	77	93	102	108		43.3962	48.4277	58.4906	64.1509	67.9245
*0405 244 binders	numbers						%
server	top 5%	top 10%	top 15%	top 20%	top 25%		top 5%	top 10%	top 15%	top 20%	top 25%
NetMHCII	153	193	210	224	230		62.7049	79.0984	86.0656	91.8033	94.2623
NetMHCIIpan	163	199	211	228	234		66.8033	81.5574	86.4754	93.4426	95.9016
ProPred	143	175	175	175	175		58.6066	71.7213	71.7213	71.7213	71.7213
RANKPEP	129	178	205	224	224		52.8689	72.9508	84.0164	91.8033	91.8033
IEDB-ARB	36	66	91	116	132		14.7541	27.0492	37.2951	47.541	54.0984
IEDB-SMMalign	65	100	128	153	163		26.6393	40.9836	52.459	62.7049	66.8033
EpiTOP	106	162	198	222	229		43.4426	66.3934	81.1475	90.9836	93.8525
MHC2Pred	75	118	131	148	159		30.7377	48.3607	53.6885	60.6557	65.1639
*0701 336 binders	numbers						%
server	top 5%	top 10%	top 15%	top 20%	top 25%		top 5%	top 10%	top 15%	top 20%	top 25%
NetMHCII	204	270	303	315	322		60.7143	80.3571	90.1786	93.75	95.8333
NetMHCIIpan	192	243	294	309	323		57.1429	72.3214	87.5	91.9643	96.131
ProPred	166	244	244	244	244		49.4048	72.619	72.619	72.619	72.619
RANKPEP	147	225	274	294	294		43.75	66.9643	81.5476	87.5	87.5
IEDB-ARB	59	104	130	160	175		17.5595	30.9524	38.6905	47.619	52.0833
IEDB-SMMalign	86	127	163	181	205		25.5952	37.7976	48.5119	53.869	61.0119
EpiTOP	160	226	283	311	322		47.619	67.2619	84.2262	92.5595	95.8333
MHC2Pred							0	0	0	0	0
*0802 153 binders	numbers						%
server	top 5%	top 10%	top 15%	top 20%	top 25%		top 5%	top 10%	top 15%	top 20%	top 25%
NetMHCII	95	121	134	145	148		62.0915	79.085	87.5817	94.7712	96.732
NetMHCIIpan	113	132	147	151	151		73.8562	86.2745	96.0784	98.6928	98.6928
ProPred	92	109	109	109	109		60.1307	71.2418	71.2418	71.2418	71.2418
RANKPEP							0	0	0	0	0
IEDB-ARB	21	44	60	74	90		13.7255	28.7582	39.2157	48.366	58.8235
IEDB-SMMalign	39	66	82	94	102		25.4902	43.1373	53.5948	61.4379	66.6667
EpiTOP	72	105	126	140	147		47.0588	68.6275	82.3529	91.5033	96.0784
MHC2Pred	35	44	62	70	79		22.8758	28.7582	40.5229	45.7516	51.634
*0901 160 binders	numbers						%
server	top 5%	top 10%	top 15%	top 20%	top 25%		top 5%	top 10%	top 15%	top 20%	top 25%
NetMHCII	94	124	147	151	153		58.75	77.5	91.875	94.375	95.625
NetMHCIIpan	108	126	141	152	155		67.5	78.75	88.125	95	96.875
ProPred							0	0	0	0	0
RANKPEP	75	110	129	139	139		46.875	68.75	80.625	86.875	86.875
IEDB-ARB	36	54	64	71	83		22.5	33.75	40	44.375	51.875
IEDB-SMMalign	56	77	87	101	106		35	48.125	54.375	63.125	66.25
EpiTOP	79	108	133	146	151		49.375	67.5	83.125	91.25	94.375
MHC2Pred	49	76	90	106	114		30.625	47.5	56.25	66.25	71.25
*1101 275 binders	numbers						%
server	top 5%	top 10%	top 15%	top 20%	top 25%		top 5%	top 10%	top 15%	top 20%	top 25%
NetMHCII	184	231	245	259	267		66.9091	84	89.0909	94.1818	97.0909
NetMHCIIpan	173	223	251	263	266		62.9091	81.0909	91.2727	95.6364	96.7273
ProPred	160	206	206	206	206		58.1818	74.9091	74.9091	74.9091	74.9091
RANKPEP	100	158	202	226	226		36.3636	57.4545	73.4545	82.1818	82.1818
IEDB-ARB	53	76	103	123	140		19.2727	27.6364	37.4545	44.7273	50.9091
IEDB-SMMalign	75	103	148	167	186		27.2727	37.4545	53.8182	60.7273	67.6364
EpiTOP	141	198	228	252	263		51.2727	72	82.9091	91.6364	95.6364
MHC2Pred	58	80	97	112	119		21.0909	29.0909	35.2727	40.7273	43.2727
*1201 24 binders	numbers						%
server	top 5%	top 10%	top 15%	top 20%	top 25%		top 5%	top 10%	top 15%	top 20%	top 25%
NetMHCII							0	0	0	0	0
NetMHCIIpan	22	22	24	24	24		91.6667	91.6667	100	100	100
ProPred							0	0	0	0	0
RANKPEP	12	17	18	23	23		50	70.8333	75	95.8333	95.8333
IEDB-ARB	1	4	5	6	6		4.16667	16.6667	20.8333	25	25
IEDB-SMMalign	11	17	20	21	21		45.8333	70.8333	83.3333	87.5	87.5
EpiTOP	16	20	21	24	24		66.6667	83.3333	87.5	100	100
MHC2Pred							0	0	0	0	0
*1302 243 binders	numbers						%
server	top 5%	top 10%	top 15%	top 20%	top 25%		top 5%	top 10%	top 15%	top 20%	top 25%
NetMHCII	153	205	223	229	233		62.963	84.3621	91.7695	94.2387	95.8848
NetMHCIIpan	134	205	227	234	238		55.144	84.3621	93.4156	96.2963	97.9424
ProPred	121	177	177	177	177		49.7942	72.8395	72.8395	72.8395	72.8395
RANKPEP	109	152	181	199	199		44.856	62.5514	74.4856	81.893	81.893
IEDB-ARB	28	53	66	81	92		11.5226	21.8107	27.1605	33.3333	37.8601
IEDB-SMMalign	43	72	102	122	139		17.6955	29.6296	41.9753	50.2058	57.2016
EpiTOP	127	170	205	222	231		52.2634	69.9588	84.3621	91.358	95.0617
MHC2Pred	56	91	122	139	155		23.0453	37.4486	50.2058	57.2016	63.786
*1501 313 binders	numbers						%
server	top 5%	top 10%	top 15%	top 20%	top 25%		top 5%	top 10%	top 15%	top 20%	top 25%
NetMHCII	195	247	272	289	297		62.3003	78.9137	86.901	92.3323	94.8882
NetMHCIIpan	203	251	281	293	300		64.8562	80.1917	89.7764	93.6102	95.8466
ProPred	162	216	216	216	216		51.7572	69.0096	69.0096	69.0096	69.0096
RANKPEP	115	207	242	264	264		36.7412	66.1342	77.3163	84.345	84.345
IEDB-ARB	43	81	117	146	168		13.738	25.8786	37.3802	46.6454	53.6741
IEDB-SMMalign	85	125	164	199	218		27.1565	39.9361	52.3962	63.5783	69.6486
EpiTOP	170	233	263	289	302		54.3131	74.4409	84.0256	92.3323	96.4856
MHC2Pred	47	91	122	141	164		15.016	29.0735	38.9776	45.0479	52.3962
all alleles 4540 binders
server	top 5%	top 10%	top 15%	top 20%	top 25%		top 5%	top 10%	top 15%	top 20%	top 25%
NetMHCII	2472	3297	3730	4016	4165		54.7387	73.0071	82.5952	88.9283	92.2276
NetMHCIIpan	2518	3391	3902	4170	4311		55.4626	74.6916	85.9471	91.8502	94.9559
ProPred	1979	2403	2403	2403	2403		45.4629	55.2033	55.2033	55.2033	55.2033
RANKPEP	1948	2923	3502	3842	3842		44.4749	66.7352	79.9543	87.7169	87.7169
IEDB-ARB	677	1140	1540	1873	2155		14.9119	25.1101	33.9207	41.2555	47.467
IEDB-SMMalign	1007	1570	2036	2391	2679		22.1806	34.5815	44.8458	52.6652	59.0088
EpiTOP	2033	3012	3623	4031	4241		44.7797	66.3436	79.8018	88.7885	93.4141
MHC2Pred	774	1225	1605	1920	2174		18.5167	29.3062	38.3971	45.933	52.0096
